7. Arbeiter K, Greenbaum L, Balzar E *et al.* Reproducible erythroid aplasia caused by mycophenolate mofetil. *Pediatr Nephrol* 2000; 14: 195–197
8. Kim CJ, Park KI, Inoue H *et al.* Azathioprine-induced megaloblastic anemia with pancytopenia 22 years after living-related renal transplantation. *Int J Urol* 1998; 5: 100–102
9. Gossman J, Thurmann P, Bachmann T *et al.* Mechanism of angiotensin converting enzyme inhibitor-related anemia in renal transplant recipients. *Kidney Int* 1996; 50: 973–978
10. Julian BA, Brantley RRJ, Barker CV *et al.* Losartan, an angiotensin II type 1 receptor antagonist, lowers hematocrit in post-transplant erythrocytosis. *J Am Soc Nephrol* 1998; 9: 1104–1108
11. Morrone LF, Di Paolo S, Logoluso F *et al.* Interference of angiotensin-converting enzyme inhibitors on erythropoiesis in kidney transplant recipients: role of growth factors and cytokines. *Transplantation* 1997; 64: 913–918
12. Wong TY, Chan PK, Leung CB *et al.* Parvovirus B19 infection causing red cell aplasia in renal transplantation. *Am J Kidney Dis* 1999; 34: 1132–1136
13. Müller T, Sikora P, Offner G, Hoyer PF, Brodehl J. Recurrence of renal disease after kidney transplantation in children: 24 years of experience in a single center. *Clin Nephrol* 1998; 49: 82–90
14. Lapointe M, Baillie GM, Bhaskar SS *et al.* Cyclosporine-induced hemolytic uremic syndrome and hemorrhagic colitis in renal transplantation. *Clin Transplant* 1999; 13: 526–530
15. Trimarchi HM, Troung LD, Brennans S, Gonzales JM, Suki WN. FK506-associated thrombotic microangiopathy: report of two cases and review of the literature. *Transplantation* 1999; 67: 539–543
16. Doutrelepont JM, Abramowicz D, Florquin S *et al.* Early recurrence of hemolytic uremic syndrome in a renal transplant recipient during prophylactic OKT3 therapy. *Transplantation* 1992; 53: 1378–1383
17. Asaka M, Ishikawa I, Nakazawa T *et al.* Hemolytic uremic syndrome associated with influenza A virus infection in allograft recipient: case report and review of the literature. *Nephron* 2000; 84: 258–266
18. Waiser J, Budde K, Rudolph B, Ortner MA, Neumayer HH. *De novo* hemolytic uremic syndrome postrenal transplant after cytomegalovirus infection. *Am J Kidney Dis* 1999; 34: 556–559
19. Franz M, Regele H, Schmaldienst S *et al.* Posttransplant hemolytic uremic syndrome in adult retransplanted kidney graft recipients: advantage of FK506 therapy? *Transplantation* 1998; 66: 1258–1262
20. Grinyó JM, Caralps A, Carreras L *et al.* Apparent recurrence of hemolytic uremic syndrome in azathioprine-treated allograft recipients. *Nephron* 1988; 49: 301–304
21. Ramsey G. Red cell antibodies arising from solid organ transplants. *Transfusion* 1991; 31: 76–86
22. Elhence P, Sharma RK, Chaudhary RK, Gupta RK. Acquired hemolytic anemia after minor ABO incompatible renal transplantation. *J Nephrol* 1998; 11: 40–43

## IV.9.2 Leukopenia

### Guideline

**A. Because leukopenia is relatively common after kidney transplantation, regular screening and careful evaluation of its causes are recommended. Azathioprine and mycophenolate mofetil may lead to leukopenia. The combination of allopurinol and azathioprine should be avoided. Leukopenia is often associated with viral infections. (Evidence level B)**

## Commentary on Guideline IV.9.2: Leukopenia

*Guideline A.* Leukopenia in long-term renal transplant patients is usually caused by one of two factors, namely toxic effects of drugs and infection.

Azathioprine and MMF may cause leukopenia. The risk of leukopenia is related to the dose. Some patients (slow methylators) with a genetic defect of thiopurine methyltransferase may develop granulocytopenia even with low doses of azathioprine [1]. The use of allopurinol in patients given azathioprine should be avoided or the dose of azathioprine should be reduced to one-third or less, as allopurinol inhibits the enzyme xanthine-oxidase, which inactivates metabolites of azathioprine. Other drugs that may induce leukopenia in transplant patients are ganciclovir, TMP-SMX and  $\alpha$ -methyl dopa.

Moreover, a number of infections, particularly viral infections (e.g. CMV) and overwhelming bacterial infections, may be associated with granulocytopenia.

### References

1. Chocair PR, Duley JA, Simmonds HA, Cameron JS. The importance of thiopurine methyltransferase activity for the azathioprine in transplant recipients. *Transplantation* 1992; 53: 1051–1056

## IV.9.3 Erythrocytosis

### Guideline

**A. In the case of erythrocytosis, the first-line treatment should be administration of ACE inhibitors or angiotensin II receptor antagonists. (Evidence level B)**

## Commentary on Guideline IV.9.3: Erythrocytosis

*Guideline A.* Erythrocytosis, or polycythaemia, is defined as a haematocrit > 52% in men and > 49% in women. The incidence has been reported to vary between 8 [1] and 22% [2]. In ~30–40% of cases, polycythaemia may resolve spontaneously. Long duration of dialysis, acquired cystic disease, polycystic kidney disease, graft artery stenosis, graft hydronephrosis, diabetes mellitus, smoking and arterial hypertension may contribute to the development of post-transplant erythrocytosis [3] by overproduction of either erythropoietin [4] or IGF-1, which is an important regulator of erythropoiesis [5].

Patients with polycythaemia vera may suffer from arterial venous occlusive events associated with thrombocytosis, platelet dysfunction and hypervolaemia. Although one study in 53 polycythaemic transplant patients failed to find an increased incidence of thromboembolic events [6], it is likely that erythrocytosis may increase the risk of cardiovascular
